# Supplementary material
Source: PubMed Central journal article supplement (PMC5482419)
Supplement: NIHMS865554-supplement-1.pdf [file NIHMS865554-supplement-1.pdf]

## **Supplemental Information**

### **iPSC-Derived Human Microglia-Like Cells to Study Neurological Diseases**

**Edsel M. Abud, Ricardo N. Ramirez, Eric S. Martinez, Luke M. Healy, Cecilia H.H. Nguyen, Sean A. Newman, Andriy V. Yeromin, Vanessa M. Scarfone, Samuel E. Marsh, Cristhian Fimbres, Chad A. Caraway, Gianna M. Fote, Abdullah M. Madany, Anshu Agrawal, Rakez Kayed, Karen H. Gyls, Michael D. Cahalan, Brian J. Cummings, Jack P. Antel, Ali Mortazavi, Monica J. Carson, Wayne W. Poon, and Mathew Blurton-Jones**

## Supplemental Figures

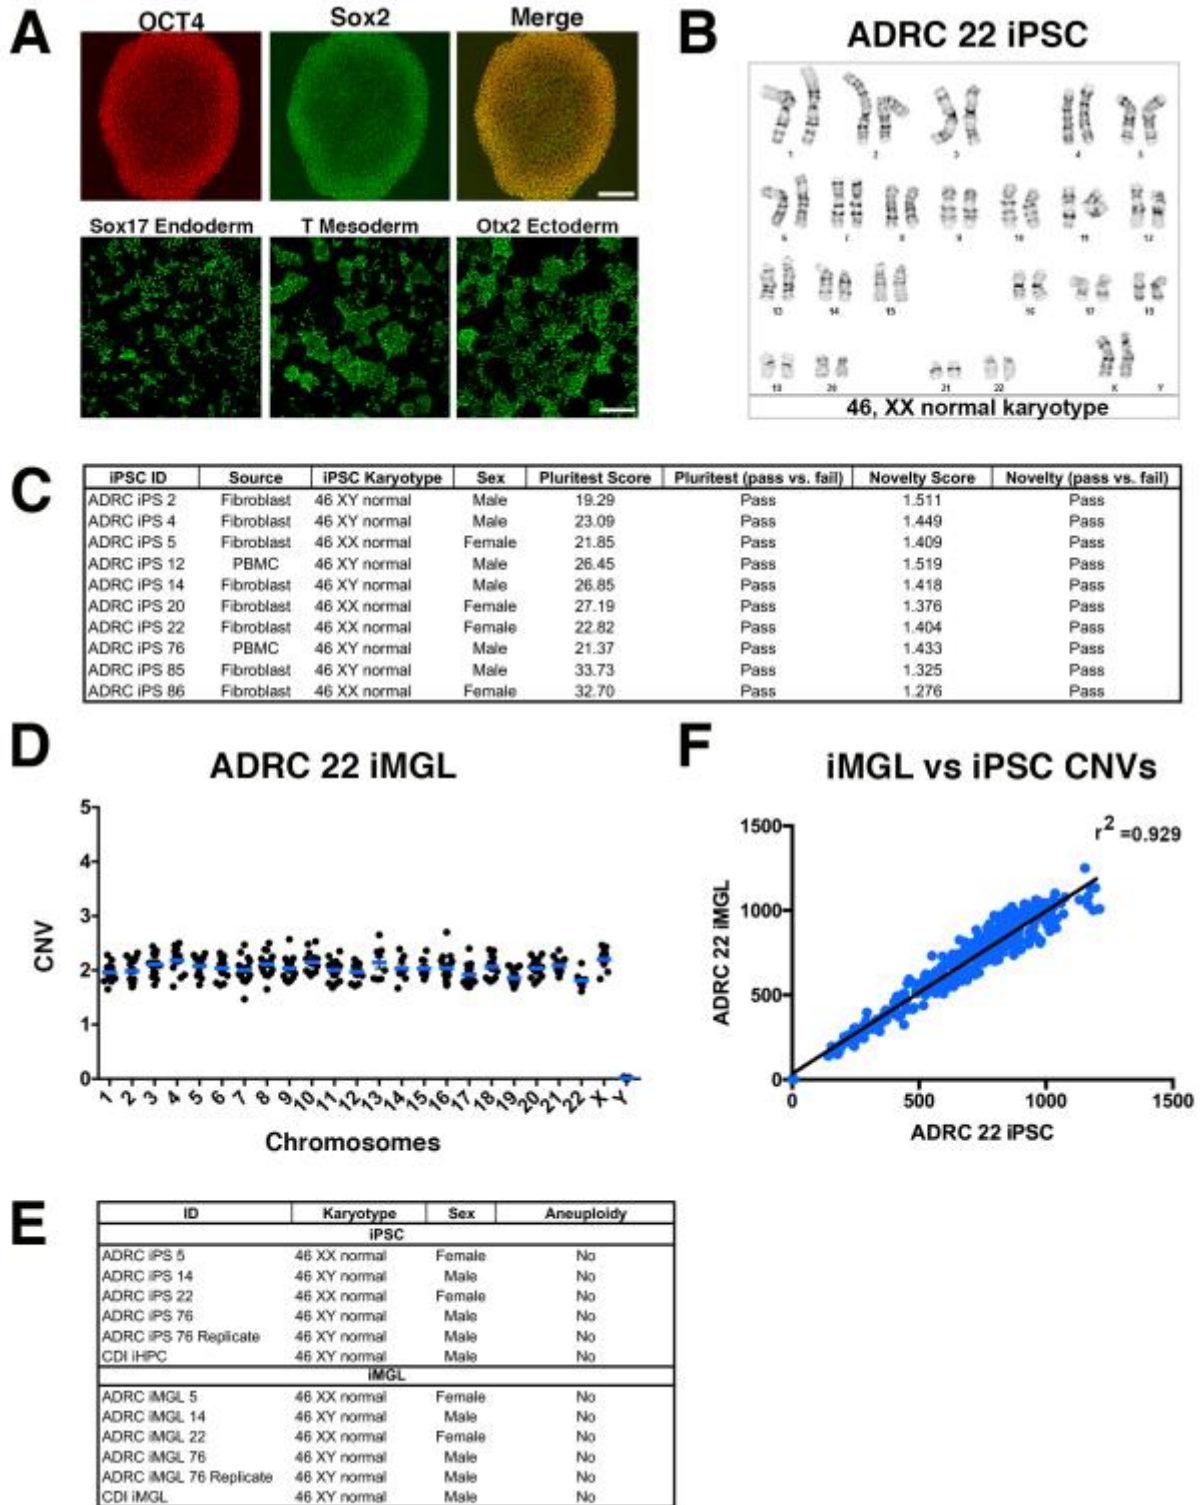

**Figure S1. Related to Figure 1. Genomic stability of iPSCs and iMGLs.** (A) Top: Representative fluorescent images of iPSCs expressing the pluripotent markers OCT4 (red) and SOX2 (green). Scale bar =300  $\mu$ m. Bottom: Functional validation of pluripotency in iPSCs. Representative fluorescent images of iPSCs differentiated to endoderm, mesoderm and ectoderm and stained for Sox17, T (Brachyury), and Otx2 respectively to validate differentiation potential. Scale bar =200  $\mu$ m. (B-C) Karyotype and Pluritest scores indicate all iPSC lines generated using Sendai virus and used in this study were karyotypically normal and pluripotent. The Pluritest is a microarray-based assessment of pluripotency based on iPS whole transcriptome analysis referenced to a library of functionally validated iPSCs (Muller, F.J. et al. 2011). (D-E) Maintenance of genomic stability over the course of iMGL differentiation using pluripotent iPS or commercial hematopoietic progenitors. CNV assessment of differentiated iMGLs reveals genomic stability is maintained over the course of differentiation. (D) Representative Nanostring nCounterKaryotype results demonstrate that microglia derived from ADRC iPS line 22 do not inherit extrachromosomal DNA over the course of differentiation. (E) Quantification of the 338 probe sets across all 24 chromosomes do not reveal any chromosomal abnormalities (n=6). (F) Representative analysis of iMGL derived from its iPSC show strong CNV correlation ( $r^2=0.929$ ) showing sensitivity of assay and genomic stability of derived iMGLs.

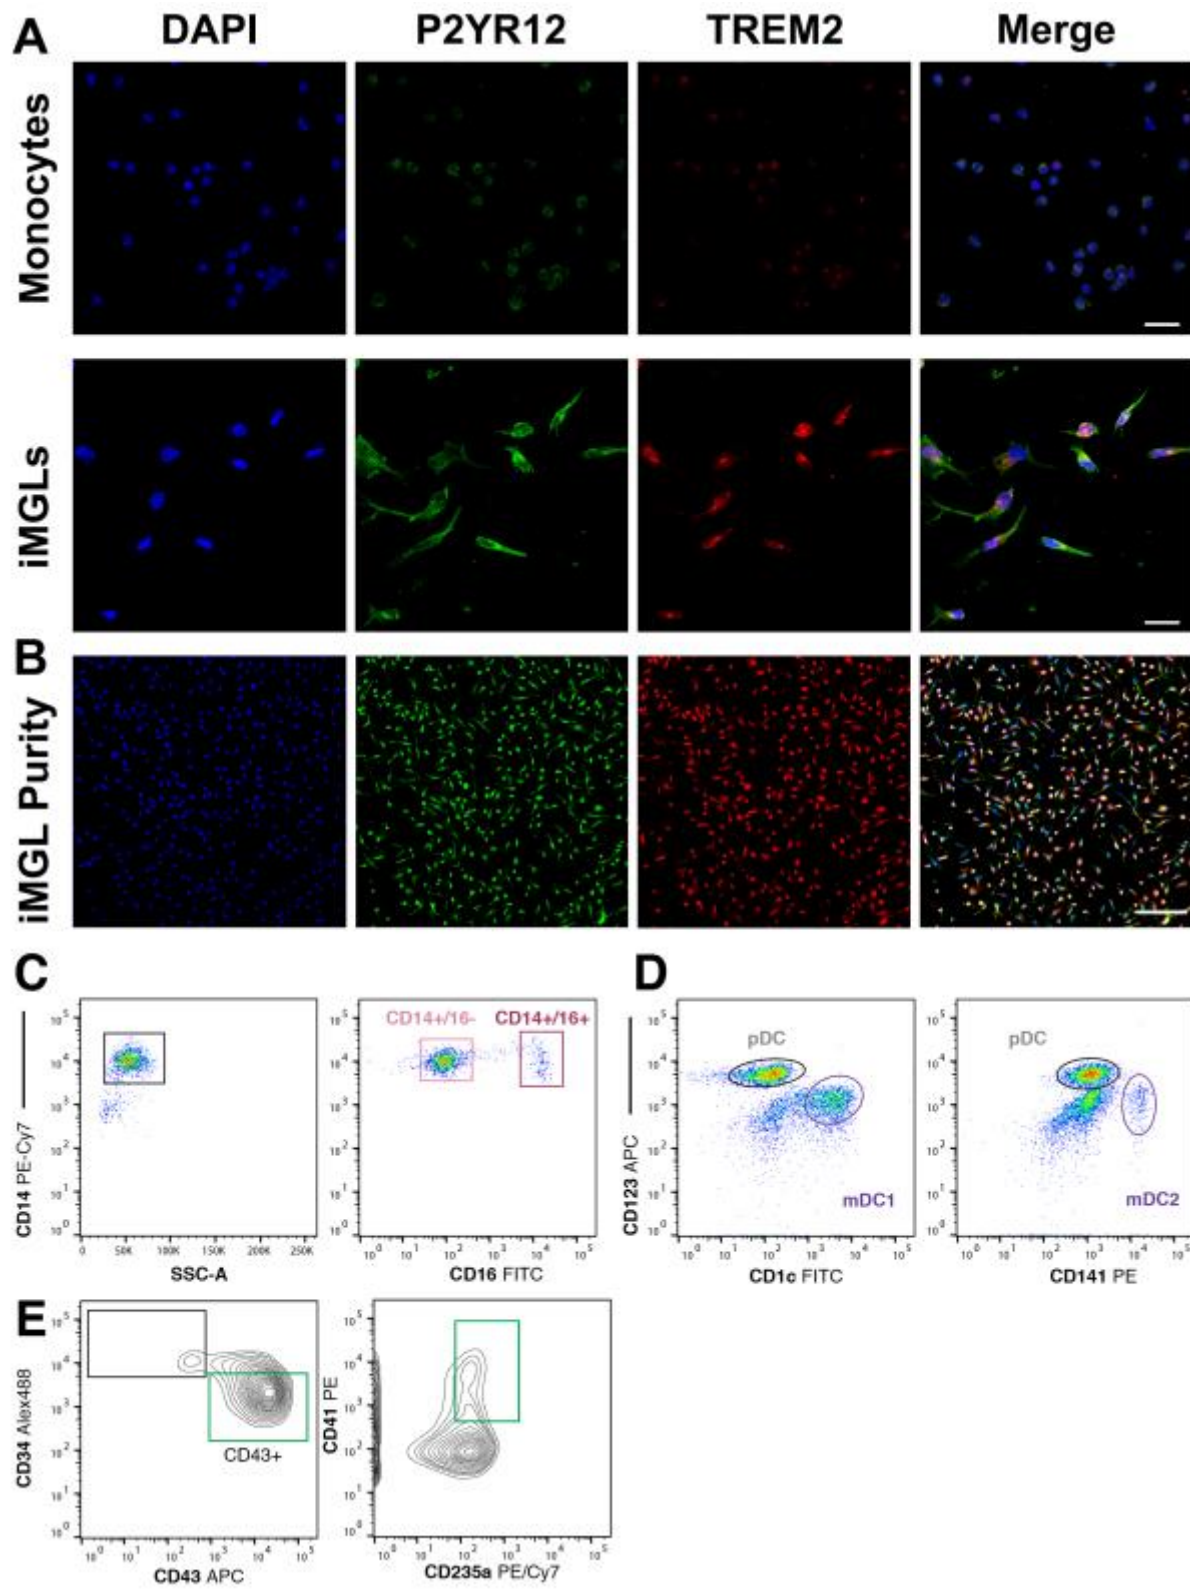

**Figure S2. Related to Figures 1 and 2. Assessment of iMGL purity by P2RY12/TREM2 co-localization and flow cytometry characterization of monocytes, dendritic cells and commercial iHPCs.** (A) Specificity assessment of rabbit anti-human P2ry12 (HPA014518, also recently validated by (Mildner et al., 2017), and goat anti-human Trem2 (R&D, AF1828) in human monocytes and iMGLs. scale bar = 20  $\mu\text{m}$  (B) Representative immunofluorescent images (from 5 representative lines) of iMGL purity by P2ry12/Trem2/DAPI co-localization. scale bar = 100 $\mu\text{m}$  (C) Human CD14<sup>+</sup>/CD16<sup>-</sup> monocytes and CD14<sup>+</sup>/CD16<sup>+</sup> inflammatory monocytes, CD14M and CD16M respectively, were isolated from young healthy human blood (18-39 y.o.) by FACS. Cells were first gated on viability (not shown), then CD14 to avoid contaminating leukocytes, and finally sorted according to CD16 expression and collected for RNA. (D) Human myeloid dendritic cells (Blood DCs) were isolated from young healthy human blood (18-39 y.o.) using untouched myeloid DC enrichment kit followed by FACS. To avoid plasmacytoid DC contamination, DCs were stained for CD123, and myeloid DC subtypes CD1c, and C141 were collected for RNA. (E) A commercial iPSC-HPC source (CD43<sup>+</sup>/235a<sup>+</sup>/CD41<sup>+</sup>) cells were identified and used to compare to in-house iHPC differentiation and further iMGL differentiation.

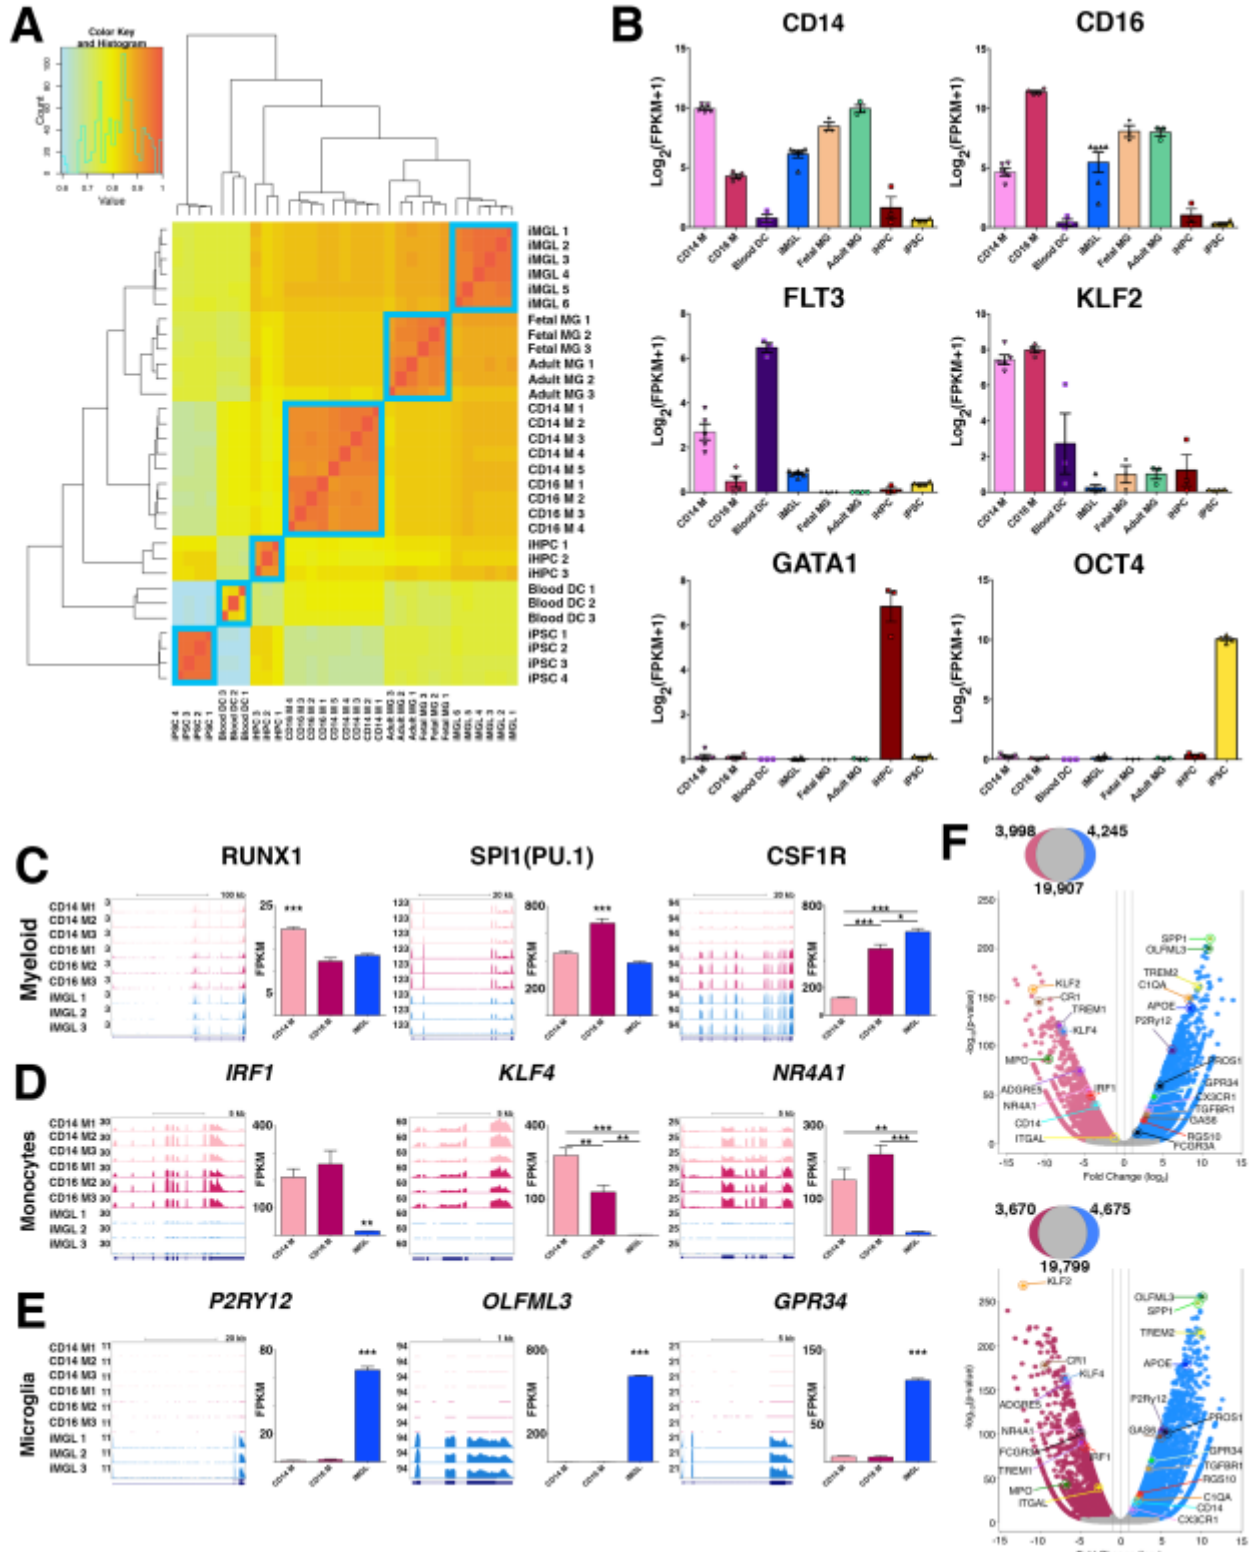

**Figure S3. Related to Figure 2. Correlational Matrix of biological samples used in RNA-sequencing and iMGL gene example genes.** (A) Spearman correlational matrix of biological samples used in RNA-sequencing highlights strong intra-group correlation. iMGLs correlate well with Fetal and Adult MGs suggesting strong gene expression similarity between samples. (B) Histograms of key genes found across different samples. CD14 and FCGR3A (also known as CD16) expressed in all myeloid cells including microglia, although enriched in CD14 M and CD16 M, respectively. As expected, FLT3 is highly expressed in Blood DCs and not in other cells and is barely detected in all three microglia groups. The monocyte/macrophage-specific transcription factor KLF2 was enriched in only CD14 M and CD16 M. Whereas GATA1 and OCT4 were only detected in iHPCs and iPSCs, respectively. (C-F) RNA-sequencing expression profile of iMGL reveals they are unique from CD14M<sup>-</sup> and CD16M and highly express microglial genes. (C-E) RNA-seq coverage maps and gene FPKM values in CD14 M, CD16 M, and iMGL for (C) for the myeloid genes RUNX1, PU.1, and CSF1R (D) monocyte-enriched genes IRF1, KLF4, and NR4A1 and (E) microglial-enriched genes P2RY12, OLFML3, and GPR34 in iMGL. For all RNA coverage maps, the y-axis represents Reads Per Million (RPM) scaled accordingly for all samples. Histogram comparisons using FPKM values for all genes are shown as the mean $\pm$  s.e.m. Biological replicates for CD14 M (n=5), CD16 (n=4), and iMGL (n=6) are included for comparison by one-way ANOVA followed by Turkey's multiple-comparison post-hoc test. (F) Representative volcano plots of differentially expressed genes (p-value < 0.001, two-fold change) in iMGL (blue), CD14 M (light pink), and non-significant (grey). Key genes are both colored and labeled uniquely. Fold change ( $\log_2$ ) and  $-\log_{10}$ (p-value) indicate the x and y-axis respectively. Grey dashed vertical lines indicate a two-fold change in gene expression. Venn diagrams indicate total number of differentially expressed genes for each condition. \*\*p<0.001, \*\*\*p<0.0001.

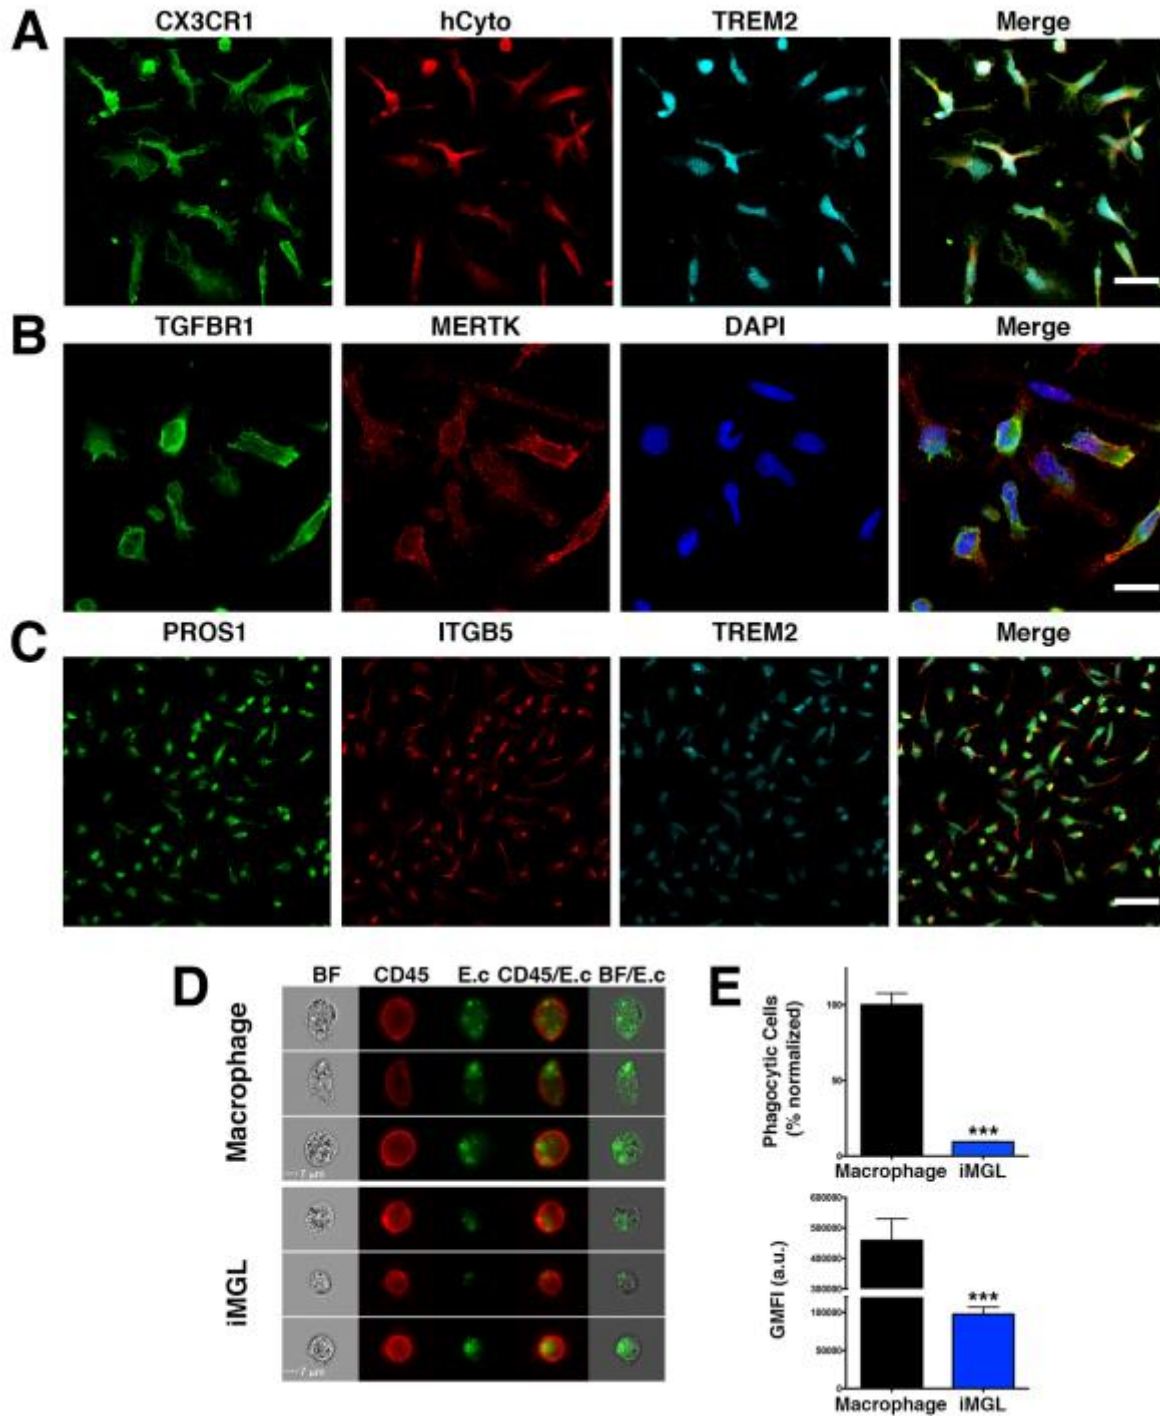

**Figure S4. Related to Figure 3. iMGLs are positive for microglia surface proteins and perform phagocytosis of *E. coli* particles.** Representative immunofluorescent images of iMGL expressing microglial markers (A) CX3CR1 (green), hCyto (human cytoplasm marker, SC121; red), TREM2 (cyan). scale bar = 20  $\mu$ m (B) Co-localization of TGFBR1(green), MERTK (red), nuclei (DAPI, blue) scale bar = 20  $\mu$ m. (C) PROS1 (green), ITGB5 (red), TREM2 (cyan). scale bar = 100  $\mu$ m (D-E) Assessment of phagocytosis of pHrodo-labeled *E. coli* (E.c; green) (D-E) in human monocyte-derived macrophages (black) and iMGLs (blue). (D) Representative bright field



and immunofluorescent images captured by Amnis Imagestream flow cytometer visualizing phagocytosis of E.c within macrophages (top) and iMGL (bottom). **(E)** Quantification of percent phagocytic cells (top) reveals that iMGLs (blue) phagocytose E.c almost 10-fold less frequently than macrophages (black) as expected. **(B:** bottom) The amount of E.c internalized (by GMFI) within phagocytic cells further illustrates the greater phagocytic capacity of macrophages compared to iMGLs. , n=3/group. Student's T-test,\*\*\* p<0.001.

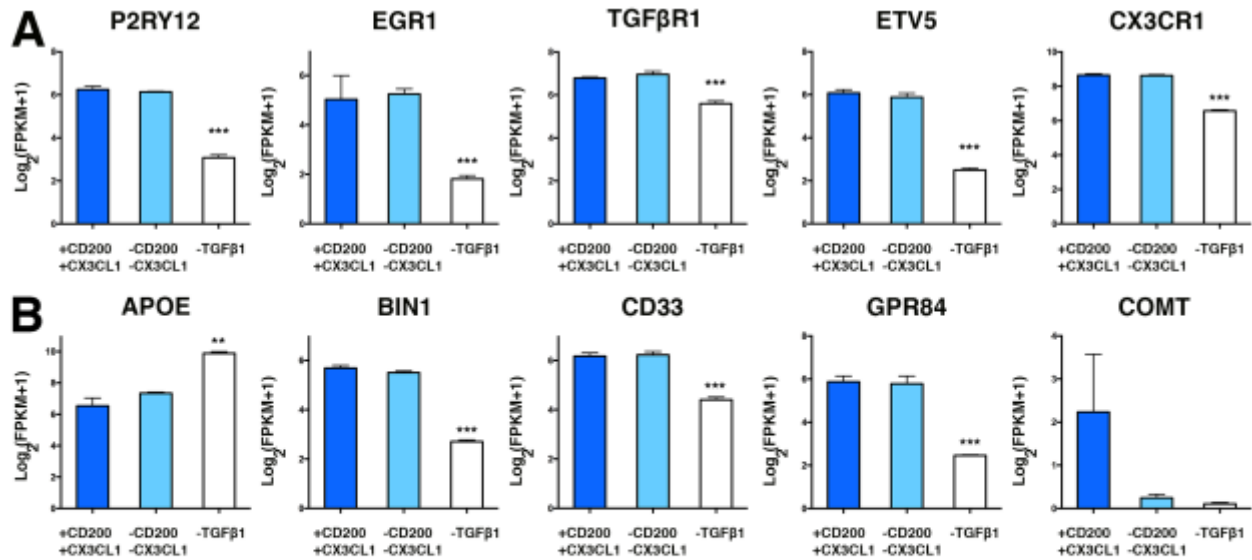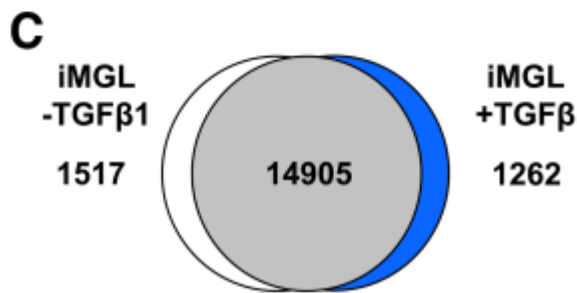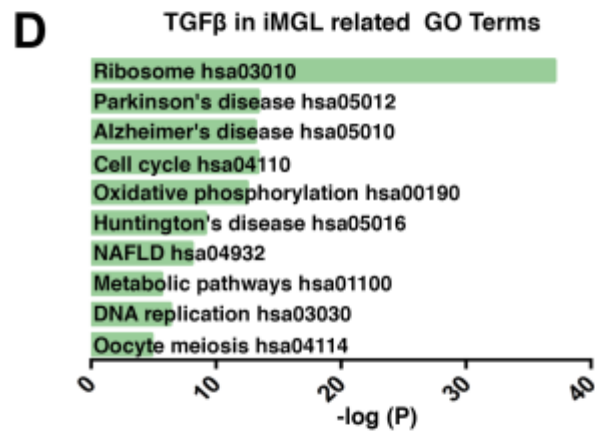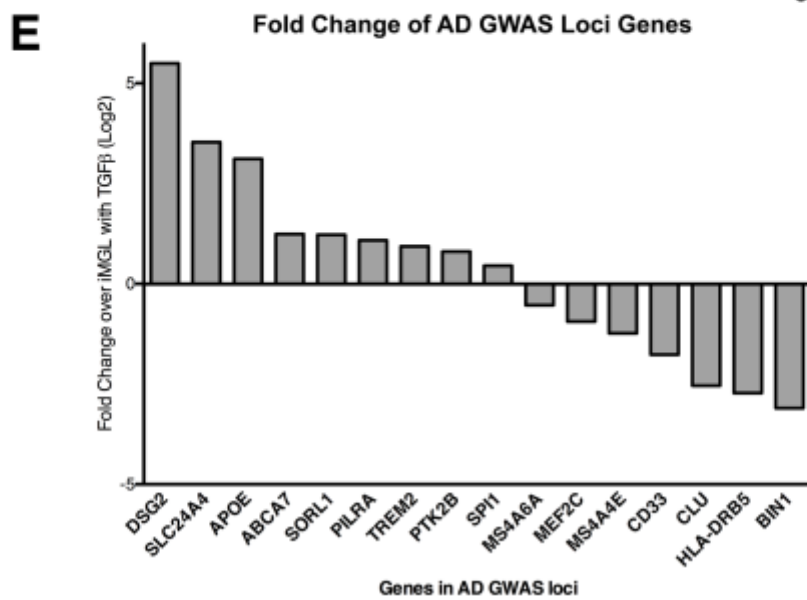

**Figure S5. Related to Figures 2 and 4. TGFβ-1, CX3CL1, CD200 and their impact on key microglial genes are associated with modulating neuronal function and environment. (A-B)** TGFβ1 maintains core microglial genes. Withdrawal of TGFβ1 for 24 h (white bars) strongly influences microglial transcriptome. In agreement with mouse studies *in vivo* (Butovsky, et al, 2014), TGFβ removal reduces expression of key microglia genes including surface receptors P2RY12, TGFβR1, and CX3CR1, while also reducing expression of microglia transcription factors EGR1 and ETV5. AD-associated pathway genes such as BIN1, CD33, and APOE are also influenced by the lack of TGFβ. Removal of CX3CL1 and CD200, does not change core microglia identity, but impacts state by influencing homeostatic gene expression such as, COMT, and APOE (B). (C) Differential gene expression analysis reveals that presence of TGFβ increases expression of 1262 genes in iMGLs, while lack of TGFβ reduces expression of 1517 genes, further supporting previous work highlighting the role of TGFβ in microglia development, gene signature, and function. (D) KEGG pathway analysis highlights that microglial-core genes, elevated with TGFβ, modulate pathways in CNS disease including Alzheimer's, Parkinson's, and Huntington's disease. Statistics reflect one-way ANOVA followed by Dunnett's multiple-comparison post-*hoc* test. \* p<0.05, \*\*p<0.001, \*\*\*p<0.0001.

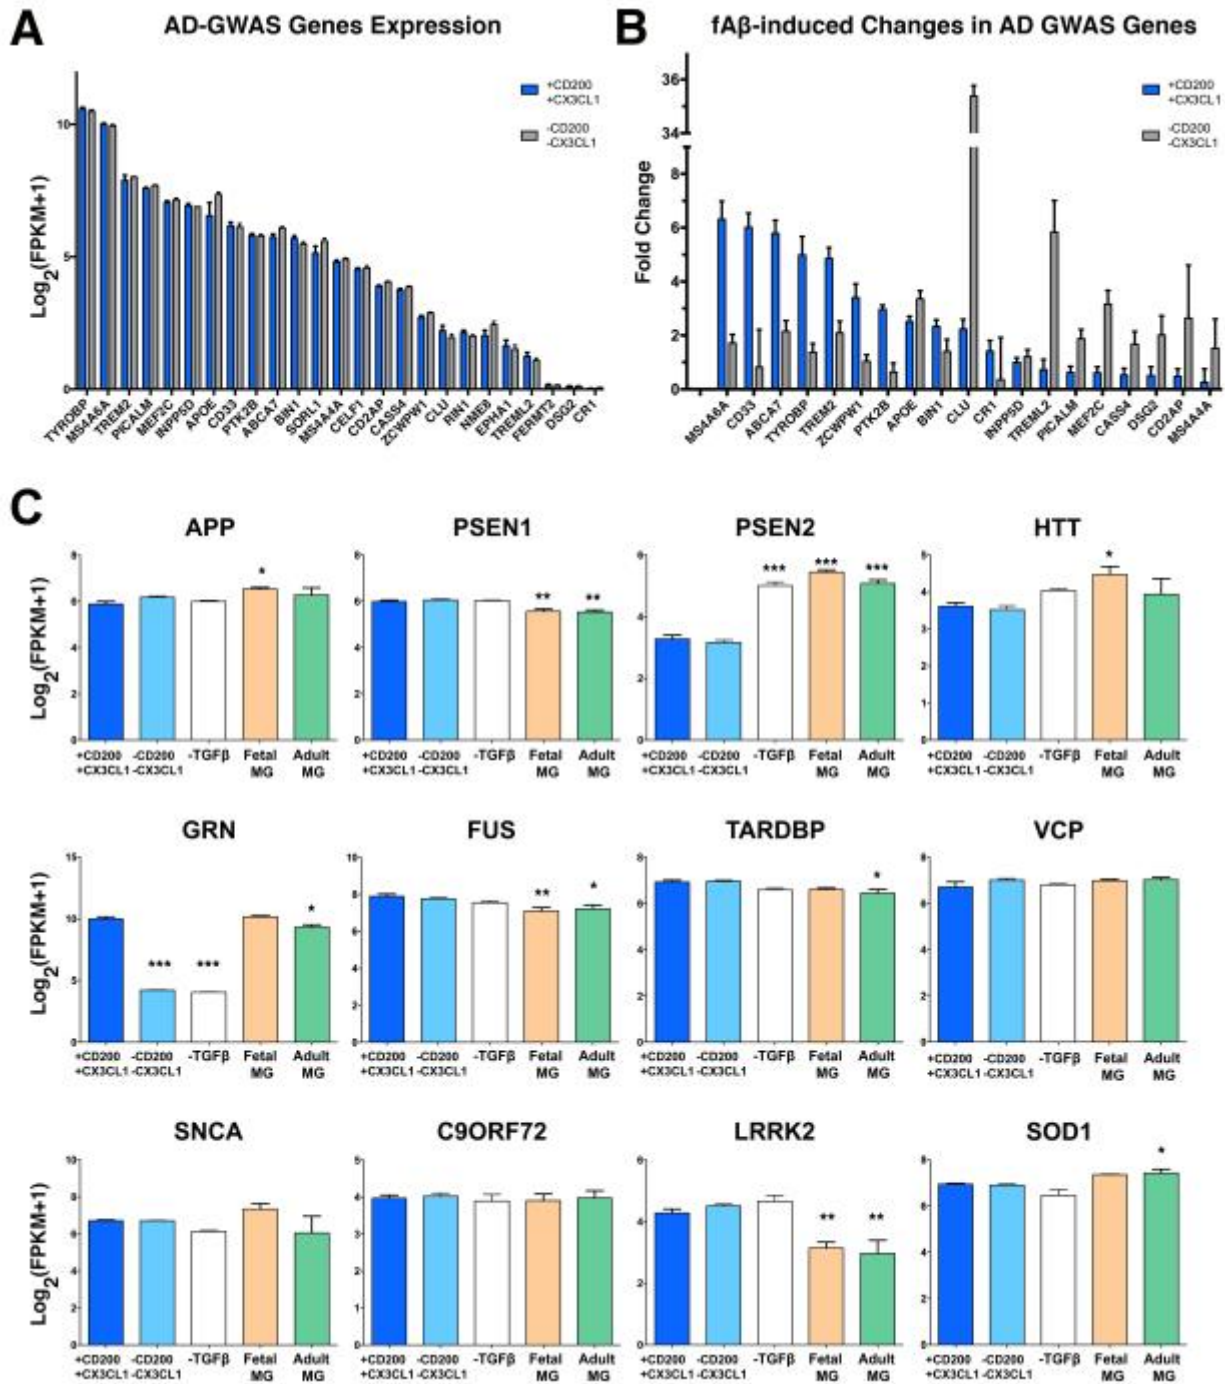

**Figure S6. Related to Figures 4 and 5.** Microglia AD-GWAS and other CNS-disease related genes can be studied using iMGLs. (A-B) iMGL AD-related GWAS genes respond to fAβ differentially if primed with or without CD200 and CX3CL1. iMGL exposure to CNS factors, CD200 and CX3CL1, “primes” their response to fAβ by increasing expression of genes with functions implicated to modulate microglia inflammation and function in AD, like CD33, ABCA7, TYROBP, and TREM2. Stimulation with fAβ of iMGLs not exposed to CD200 or CX3CL1 results in increase expression of AD GWAS-related genes CLU and APOE, genes involved in response

to misfolded proteins as well as survival and homeostasis. (C) Major neurodegenerative related genes, APP (AD), SCNA (PD) and HTT (HD), are expressed in iMGLs and primary microglia. iMGLs also express genes linked to Amyotrophic Lateral Sclerosis (ALS), Frontal-temporal Dementia (FTD), and Dementia with Lewy Bodies (DLB) and support previous studies implicating microglia dysfunction. Bar graphs of genes implicated in neurodegenerative diseases that are detected in iMGL similarly to Fetal and Adult MG, and expressed as  $\text{Log}_2(\text{FPKM} + 1)$  and presented as mean  $\pm$  SEM. Like isolated human primary microglia, iMGLs express Valosin Containing Protein (VCP), FUS binding protein (FUS), progranulin (GRN), TDP-43 (TARDBP), LRRK2, and Superoxide Dismutase (SOD). Recent literature implicates microglia dysfunction related to mutations or loss of function of these genes playing a role in the pathogenesis of ALS (SOD1, TARDBP, FUS), FTD (VCP, GRN, TARDBP), PD (LRRK2, SNCA), and DLB (SNCA), suggesting the utility of iMGLs in studying the underlying mechanism of these genes in these neurological diseases. Statistics reflect one-way ANOVA followed by Turkey's multiple-comparison *post-hoc* test. \*  $p < 0.05$ , \*\* $p < 0.001$ , \*\*\* $p < 0.0001$ .

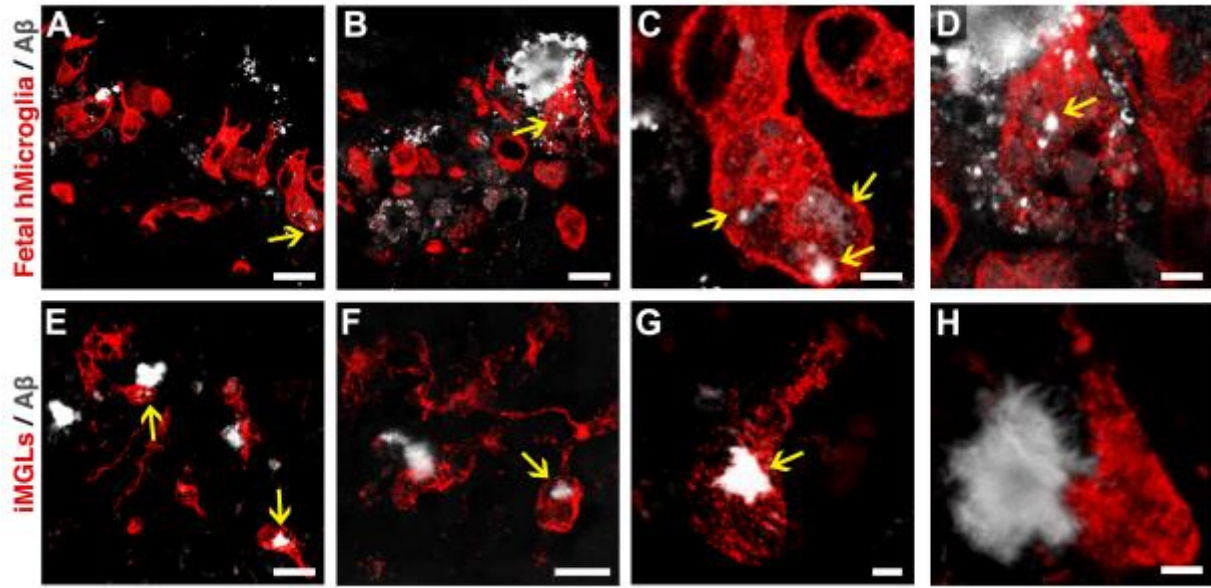

**Figure S7. Related to Figure 7. iPS-derived microglial cells engraft and phagocytose A $\beta$  like human fetal microglia.** (A-D) Human fetal microglia (hCyto, red) were transplanted into immune deficient AD mouse model, Rag5xfAD, (Marsh et al., 2016), and respond to beta-amyloid plaques. Fetal microglia are observed surrounding plaques (C), and phagocytosing A $\beta$  (yellow arrows; C-D). (E-H) Like fetal microglia, iMGLs (hCyto, red) surround and phagocytose (yellow arrows) beta-amyloid plaques. Scale bars (A, B, E, F) = 20  $\mu$ m, (C, D, H, G) 5  $\mu$ m.

**Table S1: Adjusted *p*-values for 12 genes across all groups.**

| COMPARISONS           | GENES    |          |          |          |          |          |
|-----------------------|----------|----------|----------|----------|----------|----------|
|                       | P2RY12   | GPR34    | CABLES1  | BHLHE41  | TREM2    | OLFML3   |
| CD14+ M VS. CD16+ M   | 0.7965   | > 0.9999 | > 0.9999 | > 0.9999 | 0.9987   | 0.9871   |
| CD14+ M VS. BLOOD DC  | 0.7531   | 0.0063   | 0.5606   | > 0.9999 | 0.6405   | > 0.9999 |
| CD14+ M VS. IMGL      | < 0.0001 | < 0.0001 | < 0.0001 | 0.0064   | < 0.0001 | < 0.0001 |
| CD14+ M VS. FETAL MG  | < 0.0001 | < 0.0001 | < 0.0001 | < 0.0001 | < 0.0001 | < 0.0001 |
| CD14+ M VS. ADULT MG  | < 0.0001 | < 0.0001 | < 0.0001 | < 0.0001 | < 0.0001 | < 0.0001 |
| CD16+ M VS. BLOOD DC  | 0.2047   | 0.0129   | 0.6603   | > 0.9999 | 0.8586   | 0.9976   |
| CD16+ M VS. IMGL      | < 0.0001 | < 0.0001 | < 0.0001 | 0.0111   | < 0.0001 | < 0.0001 |
| CD16+ M VS. FETAL MG  | 0.0004   | < 0.0001 | < 0.0001 | < 0.0001 | < 0.0001 | < 0.0001 |
| CD16+ M VS. ADULT MG  | 0.0002   | < 0.0001 | < 0.0001 | < 0.0001 | < 0.0001 | < 0.0001 |
| BLOOD DC VS. IMGL     | < 0.0001 | < 0.0001 | < 0.0001 | 0.0256   | < 0.0001 | < 0.0001 |
| BLOOD DC VS. FETAL MG | < 0.0001 | < 0.0001 | < 0.0001 | 0.0001   | < 0.0001 | < 0.0001 |
| BLOOD DC VS. ADULT MG | < 0.0001 | < 0.0001 | < 0.0001 | < 0.0001 | < 0.0001 | < 0.0001 |
| IMGL VS. FETAL MG     | < 0.0001 | > 0.9999 | 0.9483   | 0.0256   | 0.0633   | < 0.0001 |
| IMGL VS. ADULT MG     | < 0.0001 | 0.8258   | 0.3015   | 0.0001   | 0.0633   | < 0.0001 |
| FETAL MG VS. ADULT MG | 0.9987   | 0.9431   | 0.1407   | 0.2995   | > 0.9999 | 0.9998   |
| COMPARISONS           | PROS1    | APOE     | SLCO2B1  | SLC7A8   | PPARD    | CRYBB1   |
| CD14+ M VS. CD16+ M   | 0.8814   | > 0.9999 | 0.9999   | > 0.9999 | 0.4125   | 0.0011   |
| CD14+ M VS. BLOOD DC  | 0.4077   | 0.9103   | 0.9994   | 0.9965   | 0.9185   | 0.6963   |
| CD14+ M VS. IMGL      | < 0.0001 | < 0.0001 | < 0.0001 | < 0.0001 | < 0.0001 | < 0.0001 |
| CD14+ M VS. FETAL MG  | < 0.0001 | < 0.0001 | < 0.0001 | < 0.0001 | < 0.0001 | < 0.0001 |
| CD14+ M VS. ADULT MG  | < 0.0001 | < 0.0001 | < 0.0001 | < 0.0001 | < 0.0001 | < 0.0001 |
| CD16+ M VS. BLOOD DC  | 0.9391   | 0.9455   | 0.9941   | 0.9987   | 0.138    | 0.0002   |
| CD16+ M VS. IMGL      | < 0.0001 | < 0.0001 | < 0.0001 | < 0.0001 | < 0.0001 | < 0.0001 |
| CD16+ M VS. FETAL MG  | < 0.0001 | < 0.0001 | < 0.0001 | < 0.0001 | < 0.0001 | < 0.0001 |
| CD16+ M VS. ADULT MG  | < 0.0001 | < 0.0001 | < 0.0001 | < 0.0001 | < 0.0001 | < 0.0001 |
| BLOOD DC VS. IMGL     | < 0.0001 | < 0.0001 | < 0.0001 | < 0.0001 | < 0.0001 | < 0.0001 |
| BLOOD DC VS. FETAL MG | < 0.0001 | < 0.0001 | < 0.0001 | < 0.0001 | 0.0004   | < 0.0001 |
| BLOOD DC VS. ADULT MG | < 0.0001 | < 0.0001 | < 0.0001 | < 0.0001 | < 0.0001 | < 0.0001 |
| IMGL VS. FETAL MG     | 0.0008   | < 0.0001 | 0.2803   | 0.0127   | 0.091    | > 0.9999 |
| IMGL VS. ADULT MG     | 0.2533   | < 0.0001 | 0.9909   | 0.4987   | 0.403    | < 0.0001 |
| FETAL MG VS. ADULT MG | 0.1787   | > 0.9999 | 0.7213   | 0.4966   | 0.9658   | < 0.0001 |

**Table S1. Related to Figure 2.** Adjusted  $p$ -values for 12 genes across all groups. one-way ANOVA followed by Tukey's *post-hoc* test. \*  $p < 0.05$ , \*\* $p < 0.001$ , \*\*\* $p < 0.0001$ .



**Table S2: ELISA cytokine values (pg/ml) from conditioned media of stimulated iMGLs.**

| Cytokines                     | Treatments <sup>1</sup> |         |                      |          |                      |          |                       |          |
|-------------------------------|-------------------------|---------|----------------------|----------|----------------------|----------|-----------------------|----------|
|                               | Vehicle                 |         | IFN $\gamma$         |          | IL-1 $\beta$         |          | LPS                   |          |
|                               | mean $\pm$ SE           | p-value | mean $\pm$ SE        | p-value  | mean $\pm$ SE        | p-value  | mean $\pm$ SE         | p-value  |
| <b>TNF<math>\alpha</math></b> | 2.56 $\pm$ 0.16         | NA      | 58.82 $\pm$ 8.80     | 0.0008   | 29.74 $\pm$ 0.65     | 0.0471   | 116.49 $\pm$ 9.77     | < 0.0001 |
| <b>IL6</b>                    | 0.00 $\pm$ 0.00         | NA      | 12.22 $\pm$ 1.44     | 0.5649   | 13.92 $\pm$ 0.41     | 0.4736   | 274.39 $\pm$ 15.25    | < 0.0001 |
| <b>IL8</b>                    | 339.21 $\pm$ 11.29      | NA      | 3549.05 $\pm$ 181.22 | < 0.0001 | 3,004.54 $\pm$ 47.58 | < 0.0001 | 4,347.96 $\pm$ 75.61  | < 0.0001 |
| <b>IL10</b>                   | 0.00 $\pm$ 0.00         | NA      | 4.59 $\pm$ 2.35      | 0.1599   | 4.42 $\pm$ 1.33      | 0.1779   | 31.31 $\pm$ 1.52      | < 0.0001 |
| <b>IL1<math>\alpha</math></b> | 1.59 $\pm$ 0.07         | NA      | 1.48 $\pm$ 0.25      | 0.9999   | 4.89 $\pm$ 1.45      | 0.2535   | 30.55 $\pm$ 2.19      | < 0.0001 |
| <b>CCL2</b>                   | 96.59 $\pm$ 6.27        | NA      | 993.26 $\pm$ 55.76   | 0.0052   | 275.98 $\pm$ 19.54   | 0.7069   | 5,695.46 $\pm$ 275.72 | < 0.0001 |
| <b>CCL3</b>                   | 104.91 $\pm$ 7.70       | NA      | 295.39 $\pm$ 19.72   | 0.0043   | 556.24 $\pm$ 54.01   | < 0.0001 | 0.00 $\pm$ 0.00       | 0.0807   |
| <b>CCL4</b>                   | 3,140.81 $\pm$ 165.84   | NA      | 4,514.72 $\pm$ 10.01 | < 0.0001 | 4,492.26 $\pm$ 51.35 | < 0.0001 | 4,594.57 $\pm$ 33.96  | < 0.0001 |
| <b>CXCL10</b>                 | 9.62 $\pm$ 1.48         | NA      | 0.00 $\pm$ 0.00      | 0.1762   | 69.49 $\pm$ 4.73     | < 0.0001 | 73.72 $\pm$ 4.53      | < 0.0001 |
| <b>CCL17</b>                  | 4.70 $\pm$ 0.83         | NA      | 25.82 $\pm$ 1.98     | 0.0168   | 21.75 $\pm$ 1.94     | 0.0464   | 92.96 $\pm$ 7.70      | < 0.0001 |

**Table S2, Related to Figure 3.** Elisa cytokine values (pg/ml) from conditioned media of iMGLs stimulated by IFN $\gamma$ , IL-1 $\beta$ , and LPS for Figure 3B. Values and statistics are reported in mean  $\pm$  standard error. n=3 per group. One-Way ANOVA followed by Dunnett's *post-hoc* test. Adjusted *p*-values for multiple comparisons are reported. \* *p*<0.05, \*\**p*<0.001, \*\*\**p*<0.0001.

**Table S3. QPCR results of iMGLs stimulated with fA $\beta$  or BDTO.**

| Treatments <sup>1</sup> |                                             |       |                                             |                     |                         |          |
|-------------------------|---------------------------------------------|-------|---------------------------------------------|---------------------|-------------------------|----------|
| GENES                   | fA $\beta$                                  | BDTO  |                                             | fA $\beta$ vs. BDTO |                         |          |
|                         | Fold Change (over vehicle)<br>mean $\pm$ SE | Genes | Fold Change (over vehicle)<br>mean $\pm$ SE | Genes               | Fold difference<br>mean | p-value  |
| MS4A6A                  | 6.32 $\pm$ 0.32                             | CD2AP | 4.62 $\pm$ 0.45                             | MS4A6A              | 4.731                   | < 0.0001 |
| CD33                    | 6.02 $\pm$ 0.41                             | CLU   | 3.84 $\pm$ 0.67                             | CD33                | 5.178                   | < 0.0001 |
| ABCA7                   | 5.79 $\pm$ 0.44                             | BIN1  | 2.56 $\pm$ 0.66                             | ABCA7               | 3.333                   | 0.0014   |
| TYROBP                  | 4.99 $\pm$ 0.31                             | ABCA7 | 2.46 $\pm$ 0.70                             | TYROBP              | 3.756                   | 0.0002   |
| TREM2                   | 4.86 $\pm$ 0.50                             |       |                                             | TREM2               | 3.426                   | 0.0009   |
| ZCWPW1                  | 3.41 $\pm$ 0.42                             |       |                                             | ZCWPW1              | 2.610                   | 0.0323   |
| PTK2B                   | 2.97 $\pm$ 0.16                             |       |                                             | PTK2B               | 2.483                   | 0.0525   |
| APOE                    | 2.52 $\pm$ 0.19                             |       |                                             |                     |                         |          |
| BIN1                    | 2.34 $\pm$ 0.69                             |       |                                             | CD2AP               | -4.144                  | < 0.0001 |
| CLU                     | 2.24 $\pm$ 0.78                             |       |                                             |                     |                         |          |

<sup>1</sup>Treatments: fA $\beta$  (5  $\mu$ g/ml) or BDTO (5  $\mu$ g/ml) 24 h.

**Table S3. Related to Figure 4.** QPCR results of iMGLs stimulated with fA $\beta$  or BDTO. Results represent genes with fold change greater than 2. Results presented as mean  $\pm$  standard error. n=6 per group. Two-way ANOVA followed by Sidak's *post-hoc* test. Adjusted *p*-values for multiple comparisons. \* *p*<0.05, \*\**p*<0.001, \*\*\**p*<0.0001.

**Table S4:** Top GO pathways enriched in Adult MG compared to Fetal MG and iMGLs.

| Adult MG vs Fetal MG                      |         |          |               | Adult MG vs iMGL                                 |         |          |              |
|-------------------------------------------|---------|----------|---------------|--------------------------------------------------|---------|----------|--------------|
| Description                               | GO ID   | LogP (-) | Log (q-value) | Description                                      | GO ID   | LogP (-) | Log(q-value) |
| Extracellular matrix organization         | 0030198 | 38.10    | -34.18        | Regulation of cell migration                     | 0030334 | 13.23    | -9.58        |
| Circulatory system development            | 0072359 | 36.87    | -33.23        | Regulation of cell adhesion                      | 0030155 | 11.46    | -8.12        |
| Single organism cell adhesion             | 0098602 | 32.24    | -29.04        | Actin filament-based process                     | 0030029 | 11.03    | -7.78        |
| Regulation of nervous system development  | 0051960 | 28.56    | -25.55        | Regulation of anatomical structure morphogenesis | 0022603 | 10.95    | -7.74        |
| Regulation of cellular component movement | 0051270 | 26.49    | -23.54        | Cell junction organization                       | 0034330 | 10.29    | -7.12        |
| Adaptive immune response                  | 0002250 | 25.87    | -22.96        | Enzyme linked receptor protein signaling pathway | 0007167 | 9.73     | -6.76        |
| Response to cytokine                      | 0034097 | 20.02    | -17.49        | Circulatory system development                   | 0072359 | 8.59     | -5.79        |
| Epithelial cell proliferation             | 0050673 | 19.25    | -16.74        | Single-organism catabolic process                | 0044712 | 8.13     | -5.42        |
| Central nervous system development        | 0007417 | 19.12    | -16.63        | Oxidation-reduction process                      | 0055114 | 7.78     | -5.11        |
| Negative regulation of cell proliferation | 0008285 | 18.82    | -16.34        | Plasma membrane organization                     | 0007009 | 7.35     | -4.76        |
| Tissue morphogenesis                      | 0048729 | 18.50    | -16.06        | Cellular response to oxygen-containing compound  | 1901701 | 7.31     | -4.73        |
| Muscle structure development              | 0061061 | 17.98    | -15.56        | Negative regulation of cell proliferation        | 0008285 | 7.28     | -4.72        |
| Single organism cell adhesion             | 0050808 | 17.86    | -15.48        | Positive regulation of phosphorylation           | 0042327 | 7.14     | -4.63        |
| Regulation of nervous system development  | 0042063 | 17.26    | -14.91        | Renal system development                         | 0072001 | 6.77     | 4.30         |
| Regulation of Growth                      | 0040008 | 16.62    | -14.32        |                                                  |         |          |              |

**Table S4. Related to Figure 2. Gene ontology terms enriched in Adult MG vs Fetal MG and iMGL.**

**Table S5:** Top GO pathways enriched in Fetal MG compared to Adult MG and iMGL.

| Fetal vs Adult MG                                                |         |          |               | Fetal MG vs iMGL                                         |         |          |              |
|------------------------------------------------------------------|---------|----------|---------------|----------------------------------------------------------|---------|----------|--------------|
| Description                                                      | GO ID   | LogP (-) | Log (q-value) | Description                                              | GO ID   | LogP (-) | Log(q-value) |
| Leukocyte chemotaxis                                             | 0030595 | 6.92     | -3.07         | Single-organism catabolic process                        | 0044712 | 10.41    | -6.64        |
| Response to acidic pH                                            | 0010447 | 4.07     | -1.33         | Regulation of cell migration                             | 0030334 | 9.90     | -6.26        |
| Inorganic ion homeostasis                                        | 0098771 | 4.04     | -1.31         | Iron ion transport                                       | 0006826 | 8.68     | -5.52        |
| Regulation of cell migration                                     | 0030334 | 3.80     | -1.18         | Divalent metal ion transport                             | 0070838 | 8.44     | -5.34        |
| Circulatory system process                                       | 0003013 | 3.72     | -1.13         | Carbohydrate metabolic process                           | 0005975 | 7.39     | -4.59        |
| Melanosome organization                                          | 0032438 | 3.70     | -1.13         | Small GTPase mediated signal transduction                | 0007264 | 6.69     | -3.99        |
| Anion transport                                                  | 0006820 | 3.54     | -1.01         | Angiogenesis                                             | 0001525 | 6.64     | -3.97        |
| Macrophage migration                                             | 1905517 | 3.47     | -0.95         | Positive regulation of transport                         | 0051050 | 6.15     | -3.59        |
| Transmembrane receptor protein tyrosine kinase signaling pathway | 0007169 | 3.23     | -0.81         | Positive regulation of intracellular signal transduction | 1902533 | 6.12     | -3.57        |
| Negative regulation of receptor activity                         | 2000272 | 3.14     | -0.76         | Aminoglycan metabolic process                            | 0006022 | 6.03     | -3.50        |
| Positive regulation of phagocytosis, engulfment                  | 0060100 | 3.13     | -0.76         | Cell projection assembly                                 | 0030031 | 5.81     | -3.31        |
| Sterol import                                                    | 0035376 | 3.13     | -0.76         | Cell-substrate adhesion                                  | 0031589 | 5.68     | -3.21        |
| Behavior                                                         | 0007610 | 3.11     | -0.75         |                                                          |         |          |              |
| Positive regulation of transport                                 | 0051050 | 3.02     | -0.70         |                                                          |         |          |              |
| Vesicle organization                                             | 0016050 | 2.96     | -0.65         |                                                          |         |          |              |

**Table S5. Related to Figure 2. Gene ontology terms enriched in Fetal MG vs Adult MG and iMGL.**

**Table S6:** Top GO pathways enriched in iMGL compared to Fetal MG and Adult MG.

| iMGL vs Fetal MG                                         |         |          |               | iMGL vs Adult MG                                                              |         |          |              |
|----------------------------------------------------------|---------|----------|---------------|-------------------------------------------------------------------------------|---------|----------|--------------|
| Description                                              | GO ID   | LogP (-) | Log (q-value) | Description                                                                   | GO ID   | LogP (-) | Log(q-value) |
| Single organism cell adhesion                            | 0098602 | 30.48    | -26.23        | Mitotic cell cycle process                                                    | 1903047 | 28.46    | -24.22       |
| Mitotic cell cycle process                               | 1903047 | 21.34    | -17.87        | Regulation of cell cycle                                                      | 0051726 | 19.26    | -15.94       |
| Immune system development                                | 0002520 | 18.56    | -15.55        | DNA replication                                                               | 0006260 | 17.22    | -14.09       |
| Regulation of cellular component movement                | 0051270 | 16.11    | -13.32        | Chromatin organization                                                        | 0006325 | 11.44    | -8.64        |
| Mitotic cell cycle phase transition                      | 0044772 | 15.94    | -13.18        | Regulation of nuclear division                                                | 0051783 | 11.25    | -8.47        |
| Leukocyte migration                                      | 0050900 | 15.19    | -12.49        | Immune system development                                                     | 0002520 | 10.90    | -8.15        |
| Taxis                                                    | 0042330 | 14.76    | -12.12        | DNA-dependent DNA replication                                                 | 0006261 | 10.22    | -7.51        |
| Positive regulation of cell differentiation              | 0045597 | 14.76    | -12.12        | Negative regulation of transcription from RNA polymerase II promoter          | 0000122 | 10.20    | -7.50        |
| Inflammatory response                                    | 0006954 | 14.64    | -12.03        | Microtubule cytoskeleton organization                                         | 0000226 | 9.96     | -7.27        |
| Anatomical structure formation involved in morphogenesis | 0048646 | 13.83    | -11.27        | Leukocyte activation                                                          | 0045321 | 9.57     | -6.94        |
| Positive regulation of cell proliferation                | 0008284 | 13.82    | -11.26        | Regulation of small GTPase mediated signal transduction                       | 0051056 | 9.16     | -6.56        |
| Positive regulation of intracellular signal transduction | 1902533 | 12.20    | -9.73         | Cell cycle G2/M phase transition                                              | 0044839 | 9.01     | -6.44        |
| Positive regulation of hydrolase activity                | 0051345 | 11.80    | -9.35         | Signal transduction by p53 class mediator                                     | 0072331 | 8.47     | -5.99        |
| Negative regulation of multicellular organismal process  | 0051241 | 11.67    | -9.23         | Regulation of transcription involved in G1/S transition of mitotic cell cycle | 0000083 | 8.34     | -5.88        |
| Negative regulation of cell proliferation                | 0008285 | 11.62    | -9.18         | Cellular response to oxygen-containing compound                               | 1901701 | 8.15     | -5.73        |

**Table S6. Related to Figure 2. Gene ontology terms enriched in iMGL vs Fetal MG and Adult MG.**

**Table S7: QPCR Primers for AD-GWAS gene expression changes attributed to fA $\beta$  or BDTO.**

| Gene           | Identifier    | Source |
|----------------|---------------|--------|
| APOE           | Hs00171168_m1 | Taqman |
| ABCA7          | Hs01105117_m1 | Taqman |
| BIN1           | Hs00184913_m1 | Taqman |
| CASS4          | Hs00220503_m1 | Taqman |
| CD2AP          | Hs00961451_m1 | Taqman |
| CD33           | Hs01076281_m1 | Taqman |
| CLU            | Hs00156548_m1 | Taqman |
| CR1            | Hs00559342_m1 | Taqman |
| DSG2           | Hs00170071_m1 | Taqman |
| INPP5D         | Hs00183290_m1 | Taqman |
| PICALM         | Hs00200318_m1 | Taqman |
| PTK2B          | Hs00169444_m1 | Taqman |
| MEF2C          | Hs00231149_m1 | Taqman |
| MS4A6A         | Hs01556747_m1 | Taqman |
| MS4A4A         | Hs01106863_m1 | Taqman |
| TREM2          | Hs00219132_m1 | Taqman |
| TREML2         | Hs01077557_m1 | Taqman |
| TYROBP (DAP12) | Hs00182426_m1 | Taqman |
| ZCWPW1         | Hs00215881_m1 | Taqman |

**Table S7. Related to STAR Methods. QPCR Primers AD-GWAS gene expression analysis.**

**Movie S1. Related to Figure 7. Z-slice of iMGLs interacting with A $\beta$  plaques in AD transgenic mice.** Confocal Z-series demonstrates the intimate interactions that occur between transplanted iMGLs (red) and fibrillar A $\beta$  plaques (white) in Rag-5xfAD mice.
